# Supplementary material for: Multicentre, randomised, open-label, parallel-group study evaluating the efficacy and safety of ixekizumab versus adalimumab in patients with psoriatic arthritis naïve to biological disease-modifying antirheumatic drug: final results by week 52
Source: PubMed Central journal article supplement — Ann Rheum Dis. 2020 Jul 12;79(10):1310–9. doi: 10.1136/annrheumdis-2020-217372 (PMC7509529; doi:10.1136/annrheumdis-2020-217372), 2020-07-12
Supplement: annrheumdis-2020-217372supp001.pdf [file annrheumdis-2020-217372supp001.pdf]

**Supplementary Information:**

Participants received approved-label dosing of assigned treatments by subcutaneous injection. All patients randomised to IXE received a 160 mg starting dose (two 80 mg injections) at week 0. IXE-treated patients received 80 mg IXE every 4 weeks from week 4 onwards unless they met criteria for moderate-to-severe psoriasis, in which case they received 80 mg IXE every 2 weeks from week 2 to week 12, followed by IXE every 4 weeks. Patients randomised to ADA received a 40 mg starting dose followed by 40 mg ADA every 2 weeks starting at week 2, or if they met criteria for moderate-to-severe psoriasis, they received an 80 mg starting dose of ADA (two 40 mg injections) at week 0, followed by 40 mg ADA every 2 weeks starting at week 1. Citrate-free formulation of ADA was administered in the study.
