# Supplementary figures and images for: Multicentre, randomised, open-label, parallel-group study evaluating the efficacy and safety of ixekizumab versus adalimumab in patients with psoriatic arthritis naïve to biological disease-modifying antirheumatic drug: final results by week 52
Source: PubMed Central journal article supplement — Ann Rheum Dis. 2020 Jul 12;79(10):1310–9. doi: 10.1136/annrheumdis-2020-217372 (PMC7509529; doi:10.1136/annrheumdis-2020-217372), 2020-07-12

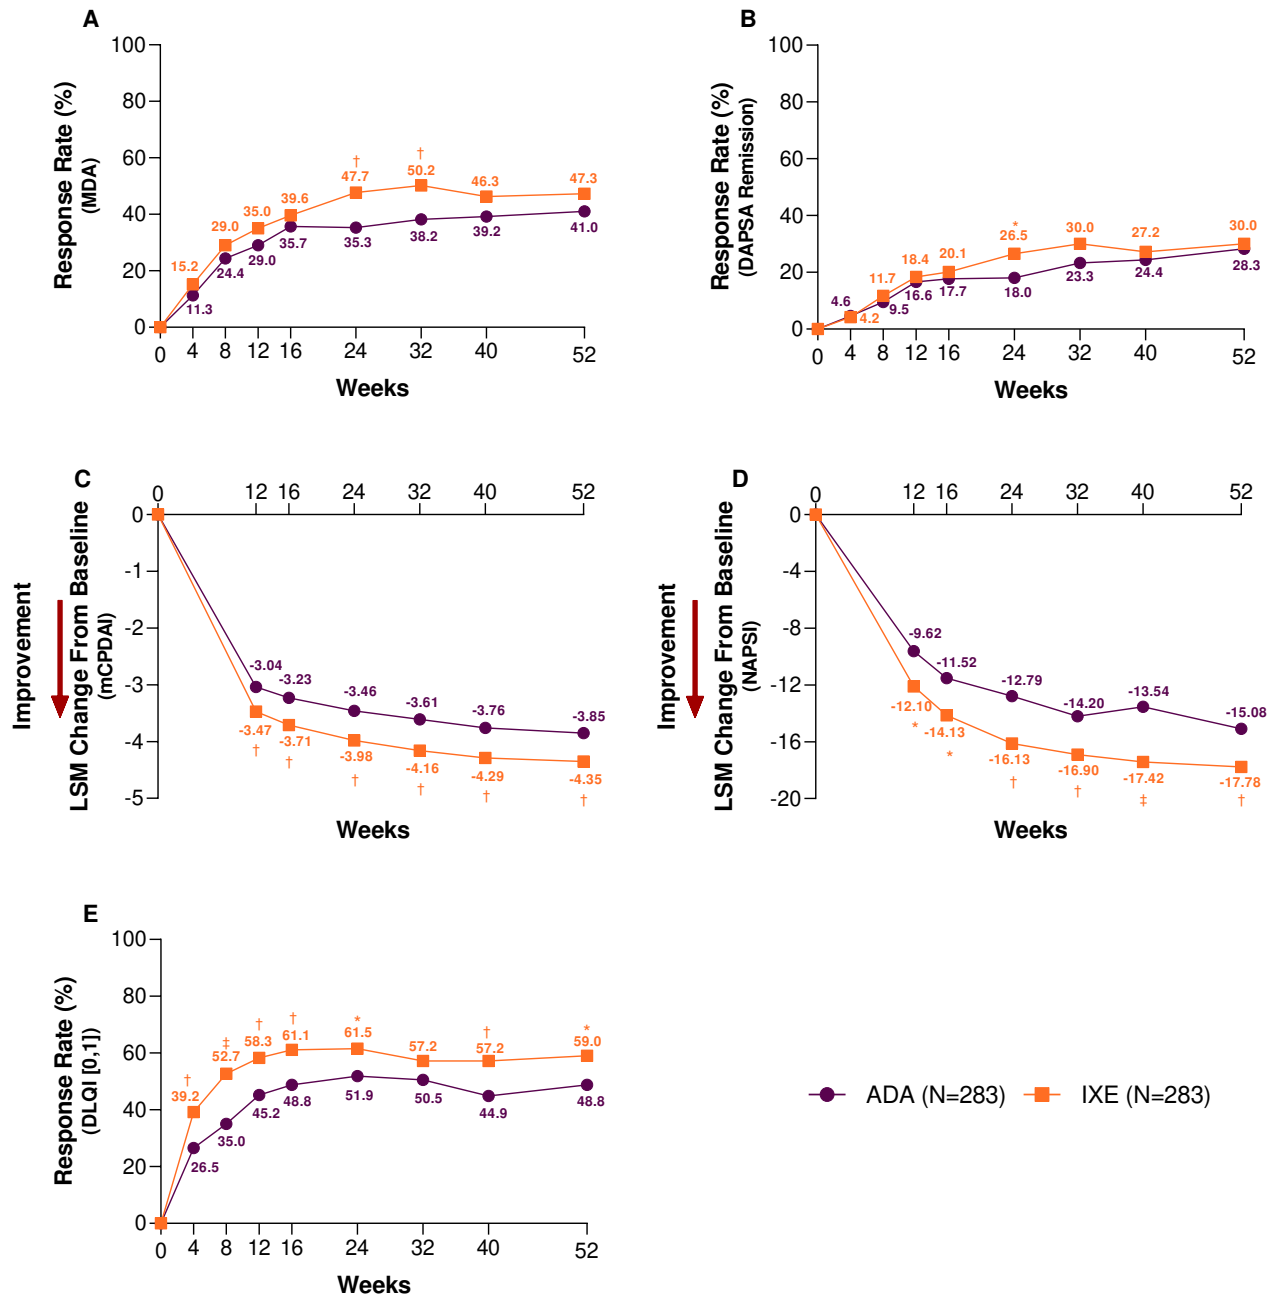

Supplement: annrheumdis-2020-217372supp002.pdf [file annrheumdis-2020-217372supp002.pdf]
